# Supplementary material for: Predictive performance of clinical scores and survival outcomes in critically ill patients with sepsis: a prospective longitudinal study at a tertiary medical centre in Ethiopia
Source: PeerJ. 2025 Oct 2;13:e20109. doi: 10.7717/peerj.20109 (PMC12497402; doi:10.7717/peerj.20109)
Supplement: Supplemental Information 2 — Patient socio-demographic data (excluding identifying variables) and vital signs, mental status and oxygen saturation. [file peerj-13-20109-s002.xlsx]

## Sheet: Sheet1
Code	Education	Employment	Marital	Income	Family size	Clinical suspecion of sepsis	Duration of illness before admission in days	Temp1	Temp2	Temp3	Temp4	Temp5	RR1	RR2	RR3	RR4	RR5	HR1	HR2	HR3	HR4	HR5	S/D BP1	S/D BP2	S/D BP3	S/D BP4	S/D BP5	OS1	OS2	OS3	OS4	OS5	UO1	UO2	UO3	UO4	UO5	GCS1	GCS2	GCS3	GCS4	GCS5	Sup. Oxygen	Diag. cat.	Site of inf.	Comorb.	No. of Comorb.	Time of antib. Admin.	Type of AB
001M	2	2	1	2000	8	2	3	36.9	36.7	36.4	36.7		22	24	24	22		80	82	88	86		110/70	106/60	110/60	114/65		94	98	96	97		700	600	900	1200		15	15	15	15		1	1		5,6	2
001S	1	2	1	5000	6	2	4	36.7	37.1	37			26	22	22			110	100	98			130/80	130/85	120/80			92	95	96			1000	1200	1500			8	10	1			1	1	1	6	2	1
002M	1		1	5000	13	1	3	36.8	37.4	37.1	36.9	37	32	26	28	24	26	95	96	98	98	96	95/54	101/57	100/63	96/61	100/58	90	92	93	93	92	100	105	110	120	100	15	15	15	15	15	1	1	5	4	2	2
002S	2	2			6	2	7	38.9	39.1	38.1	38.1	37.6	38	36	32	32	30	112	99	98	108	98	110/60	116/60	108/55	118/55	110/50	96	96	99	98	99	2100	1800	1900	1900	1700	7	8	8	9	10	1	1	7	1,4	2	2
003M	4	1	1	12000	12	1	1	37.9	36.9				24	24				86	74				86/45	106/60				92	94				50	60				13	14				1	1	3	5,6	3	2
003S	2	2	2			1		37.8	37.6	37.3	37.9	38.9	25	22	24	24	25	141	101	318	334	140	108/69	110/65	116/54	110/70	105/69	97	100	97	100	100	1230	2700	2700	3100	4600	4	4				1	1	7	1	2	1
004M	4	1	1	10000	8	1	2	36.5	36.4	36.1	35.8	36.2	22	22	24	24	24	74	76	72	80	65	160/70	145/76	168/80	155/60	160/88	96	97	99	97	96	60	65	66	60	60	13	11	11	5	4	2	1	1	5,6,7,8	4	2
004S	1	2	1	8000	7	2	7	37.5	37.3	36.6			20	32	22			110	105	90			110/75	115/75	118/78			96	95				2000	2000	2000			15	15	15			1	2	3	1	2	2
005M	2	2	2	3000	5	1	14	36.8	37.9	38.2	37.9	39	38	40	42	40	38	132	140	130	128	140	120/74	116/78	122/70	120/75	110/60	96	96	94	97	94	66	60	60	75	70	8T					1	1,2	1,6	1,3	3	2
005S	1	2	1		9	1	3	38.1	36.8	36.3			48	40	36			112	112	109			116/66	99/65	100/67			93	98	98			1500	2000	2000			15					1	1	1	3	2	1
006M		2	1			1		36.6	36.1	36.8	36.1		24	24	24	24		86	82	88	88		100/70	110/74	92/64	110/70		96	96	96	96		50	55	50	50		9	9	8	4		2	1	1	3	2	1,2
006S	1	2	2		0	2	7	37.2	36	36.7	37.7	37.8	20	18	21	21	22	134	131	128	130	128	110/70	100/75	99/67	98/68	99/70	94	98	99	97	97	2000	217	208	2300	2000	6T	6T	6T			1	1	7			1
007M	2	1	2			2		36.1	36.2	36.2	36.3	36.1	20	20	20	22	18	80	85	85	85	80	120/70	110/70	100/75	110/75	110/70	96	96	95	98	97						15	15	15	15	15	2	1
007S	3	1	2	5000	1	2	1	36.8	36.7	36.1			18	16	20			69	61	72			128/98	122/90	118/89			98	96	94			100	117	150			10T	15	15			1	2		psychiatric case	2	1
008M	2	2	1		3		9	36.8	36.7	37.4	37	36.5	16	18	20	26	18	110	130	134	128	130	128/74	150/80	148/86	140/90	120/80	98	97	98	99	97	80	92	98	99	97	3	6	9T	9T	10T	1	1	1	1,4	3	2
009M	3	1	2	10000	3	1		37.7	37.8	37.8	38	37.2	32	26	30	36	34	104	102	94	86	94	120/74	117/72	110/76	131/66	135/75	96	97	97	94	92	17	300	200	300	600	6	6	10	10	13	1	1	1, uremic encephalophaty	1,4	2	2
008S	1	farmer	1	10000	8	1	14	36.5					15	20	18			120	118	111			137/51	130/50	129/-			92	90	89			101	89	105			2T					1	2		6	2	2
011M	4		2			1	1	37.2	36.8	36.6	36.8	36.7	14	18	18	26	20	120	116	108	89	80	138/90	120/80	120/74	122/76	118/78	97	98	98	96	95	1400	1700	2000	2000	2000	3	4	6	10	11	1	1	1	1,4	3	1
009S	1	daily labourer	1	10000	5	1	1	37	36.5	37			24	23	25			124	112	116			115/77	117/80	118/75			98	99	97			1000	1200	800			2T	5	6T			1	2	1			2
010S	1	1	1	3000	7	1	18	37.8	37.3	36.8			32	29	26			133	124	122			110/72	105/71	117/69			30	30	30			20					10T					1	2	3			1
011S	2	1	2			2	1	37.1	37.3	37.6	36.9	36.1	46	41	38	40	32	138	124	118	124	122	110/64	110/66	100/60	115/60	110/50	98	99	100	97	98	2.6	4.2	5.3	4.6		7	7	7	8		1	2
012M	1		1		4	2		37	36.2	36	36.2		24	22	24	22		88	87	87	86		90/50	89/48	88/46	87/58		90	91	92	94		500	1000	200	800		11	15	15	15		1	1				1
013M	3		1	8000	8	1	30	36.5	36.4	36.5	37.5	37.6	22	24	22	26	28	96	94	96	97	96	140/86	140/76	136/82	138/84	140/76	96	94	96	94	96	800	200	1700	1200	96	13	13	11	4	4	1	1	4,7	5,6,8	4	1	cetriaxone
012S	2	2	1	1000	2	2	11	36.4	36.5	36.7			22	20	18			105	92	82			110/70	99/91	77/78			99	98	91			20	150	20			15					2	2
014S	2		2		1			37.8	36	36.5			30	27	22			101	109	111			120/69	117/71	119/80			70	90	89			101	80	90			15	15	15			1	1	1			2
015S	1		1	2000				35.7	35.6	36	35.5	36.3	26	27	24	25	27	70	66	65	72	64	108/77	123/70	120/80	100/72	118/72	97	94.5	95	94	95	45	1.4	1.3	1.3	1.3	2T					1	2			2	2
016M	3		1		7	2		37					28					78					122/96					95					200					15					1	1
016S	2	2	1	2000	7	2		35.5	36	35.5	35.8	36	16	17	16	15	16	117	110	118	120	115	90/60	92/70	88/65	91/62	92/63	95	94	96	94	95	1.25	1.28	1.3	1.3	1.2	10T					1	2	6			2
017S	2	2	2			2		38.4	38	38			17	19	22			110	114	115			104/89	119/75	125/81			98	96	99			1000	650				13					1	1	ear			2
017M	1	2	1		6	2	2	36	38	37.8	37.8	36.9	36	36	32	28		124	112	109	108		120/67	114/74	116/76	124/74		92	93	92	99		2000	1000	1500	2000		10T	10T	10T	12		1	1	1	4		2
018M	1	2	1	6000	4			36.7					32					109					103/61					94										12					2	1	5	4,6	2	1
018S	1	1	1	6000		1		38.1	39.6	38.3	39.6	39	16	18	14	27	34	131	86	116	114	134	104/53	111/70	115/72	111/71	124/85	96	97	98	99	98						15					1	1
019S	1	1	1		8	2	3	36	37	36			32	32	28			110	89	80			117/79	116/76	118/80			93	95	96								15	15				2	1
020M	1	2	1	6000	3	2	6	38	36.6	36.5			24	22	20			124	90	115			120/70	90/60	115/75			92	94	96			80	75	80			15	15	15			2	1				1
020S	1	2	1	2000	5	2		36.2					30					92					95/60					89					1										1	1
021M	4	1	1	10000		2		36.4	36.1	36.6	36.7	36.9	22	24	22	22	20	88	94	100	104	100	140/80	110/70	100/70	100/80	100/70	97	98	98	99	97	80	80	90	90	90	15	15	15	15		2	1
021S	2	1	1	5000	3	2		37					20					87					139/89					97					600					15					2	1
022M	4	1	1	7000	8			36.8	37	36	36	36.2	28	28	24	22	22	98	100	98	78	72	98/62	96/68	100/64	98/72	98/60	94	93	96	97	97	1200	1300	1600	1600	1000	15	15	15	15	15	2	1		5,6,7	4
022S	2		1		14	2	3	35.9	36.4	36.4	36.3	36.9	20	24	24	24	24	112	110	108	106	100	89/54	108/66	104/74	108/78	98/60	95	95	95	94	96						13	13	14	14	14	1	1	1	1,4	3
023M	4	1	1	10000	3	1	1	38	39	38	38	39	28	36	32	28	28	98	102	100	106	108	128/80	136/90	140/96	138/80	126/86	92	94	96	90	89	1000	1200	600	200		3	3	3	3	3	1	1	1,5,7	1,5,6,7,11	4	1
023S	4	1	1	5000	6	2	1	37	38	36.2	36	37	22	24	23	20	16	84	86	82	80	88	154/93	155/89	145/86	135/88	130/86	98	99	99	99	98	1500	1500	1600	30	35	15	15	15	15	15	1	2				1
024M	3	2	1		4	2	2	38	38.3	37.9	37	37.6	14	13	16	18	26	110	111	108	106	110	145/78	139/79	130/98	125/79	123/85	92	92	94	94	96	1500	1700	1400	1200	1700	10T	10T	10T	10T	10T	1	1	1
024S	2	2	1	4000	4	1	7	36	37	36.5	37	37	12	21	23	22	22	112	118	119	110	109	102/74	104/82	106/78	110/80	110/78	97	98	99	98	97	30	30	30	30	30	sadated					1	2	6		1	1
025M	4	1	1		7	1		38	37.8	36.6	36.3	36.3	26	28	28	26	26	110	106	103	102	104	1365/86	130/80	125/80	120/75	115/75	96	92	96	98	96	400/hr	208	125	133	110	15	15	15	15	15	1	1	1	5,6,7	4	2
025S	2	2	1	2000	6	1		36.5	38	37.9	37	36.5	19	18	20	18	16.5	100	112	98	102	110	100/67	99/62	98/65	95.5/65.3	96/63	94	95	96	95	94	2.6	1.5	1.6	2	1.2	11	9T	9T	9T	2T	1	2	obstetrics		1	2
026M	1	2	1		8	2		36.1	38				32	18				86	108				132/100	149/92				94	92				50	200/24hr				15	15				1	1	1
026S	2	2	1		6	1	6	36.2	37.2				38	20				90	92				79/59	107/64				90										15	15				1	1	1	4	1	1
027M	1	1	1	12000	8	1	2	36.7	36.8	36.7	36.7		24	24	26	24	26	88	94	96	110		120/80	110/86	110/86			96	97	97	97		80	70	80			15	15	15	15	15	1	1
027S	1	2	1		5	1	40	37.6	37.1	36			24	28	30			110	120	72			110/70	100/72	110/85			97	99	98								14		13			1	1	1	3,5	3	1
028M	3	2	2			1	2	37.6	36.8	37.2	36.8	36.8	34	26	24	28	24	102	114	110	108	88	140/90	120/94	120/80	120/80		92	99	94	99	99						13	10T	10T	10T	10T	1	1	1		1	2
028S	4	2	2		6	2		37.3	37.1	37	37.5	37.2	30	28	30	30	27	128	125	130	130	120	107/67	110/70	117/75	110/72	118/77	99	99	99	98	99	1000	1100	1200	1000	1200	15			15		2	1	1			2
029M	2		2		4			36.7	36.7	37.2	36.7	36.7	36	38	34	34	36	118	116	108	120	118	120/70	109/65	90/60	90/55	92/60	96	98	92	96	96											1	1	8	5	2	1
029S	1	2	1	2000	3	1		37	338	37.4			28	24	28			110	112	98			115/75	110/80	122/60			98	95	92			30	30	30			2T					1	2	3	1	2	1
030M	1	1	1	2500	6	2		36					20					88					100/60					95					50ml					15					2	1
030S		1				2		36	36	37	36.7	38	16	16	18	18	20	86	82	81	81	80	106/68	104/74	100/73	110/70	105/72	98	90	98	98	94	1.2	1.5	1.2	1.3	1.2	15	15	15	15	15	2	2				2
031M	1	2	1	4500	3	1	36	36					22	22				110	98				110/70	110/70				98	98				1200	1200				15					2	1				1
031S	3	1	2	10000		2	5	36.3	36.5	35.7	36.2	35.4	24	20	24	22	24	93	83	98	110	100	107/71	110/69	123/84	118/65	120/74	92	97	94	94	95	30	30	30	40	40	2T	10T	10T	14	14	1	1	5			2
032M	3	2	1		3	2	2	38.4	36.7	36.8	37.7	36.7	28	34	34	28	28	110	120	168	120	110	140/98	140/90	135/86	140/100	130/80	94	96	98	98	97	40	40	40			5	4T	6T	6T	10T	1	1	1
034M	2	2	1	5500	7	1		36.5	37	37	37.5	37.8	32	33	35	34	34	61	102	68	68	120	128/80	130/80	120/78	110/72	100/70	96	94	92	90	90	1500	1500	1000	1000	1000	15	15	15	15	15	1	1	1,3	3	2	1
034S	3				0	1	1	36.8	37.8	36.7	36	36.2	32	25	22	22	22	132	110	99	80	83	103/60	100/78	105/70	100/79	110/80	92	98	98	96	96	40	30	31	28	30	10T	10T	15	15	15	1	2	3			2
035M	4	1		5500	2	1	10	37.6	36.2	36.5	36.8	36.2	28	22	22	28	20	110	100	100	110	110	120/86	110/80	110/70	110/86	110/80	94	95	95	94	96	100	100	100	110	100	7	3	3	3	3	1	1	1,5	2,3,4	4	1
035S	2	2	2	0	0	2	3	37	36.8				14	12				98	94				130/94	136/90				88	98				800					15					1	1				2
036M	1	2	1		4	2		36.1	36.7	36.8	36.6	36.7	22	22	22	20	24	88	80	86	84	86	100/70	90/74	104/76	110/80	106/80	96	96	97	99	98						15	15	15	15	15	2	1
036S	2	2	1	0	7	2	6	37.4	36.4				18	16				75					112/86					95	96				200					15					2	1
037S	3	2	1	5000	5	2	1	36.8	37.1				28	25	24			101	120				145/85	152/91				91	97				1ml	1ml				8	8				1	1		psychotic	2
038S		1	1	6000	5								22	22				52	154				90/51	108/58				89	93				2000	1200									1	1
039S	2	2	1	600	4	1	5	36	37	36.4	36.3	36.3	24	22	21	21	21	104	99	100	105	99	157/94	147/98	110/99	88/98	110/99	96	98	98	98	98	800	600	30	30	25	10T	15	15	15	15	1	2	3			2
040S	3	2	2	10000	0	1	1hr	39	37	36.5	37	37	13	14	14	14	14	114	120	115	115	115	140/82	220/110	200/100	170/105	167/105	97	98	98	98	97	133	30	30	30	28	2T					1	1	1	1	2	2
041S			1	2500				38.5					20					110					98/50					87					25					2T					1	2	3	1	2	1
042S	1	2	1		6	1	1	35.6					14					104					89/48					98										4					1	1	1,7	1	2	1
043S	3	2	1		3		1	38.8	38.7	38.1			49		16			127		129			109/73		105/64			84		93													1	1	1	ARDS		2
044S	4	1	2	5000	1	1		36.7	36.5	37	37	35	24	22	26	27	25	10	85	101	100	101	139/99	128/94	129/74	120/95	118/95	94	96	98	95	94		1.9	1000	1.2	1.5	1.2	10T	10T	10T	10T	1	2	3			1
046S	3	2	2	0	0	2	1	37.1	37	37.2			34	50	28			83	89	87			115/64	110/60	121/66			85	93	98			200	300				15	15	15			1	1	1			2
047S	4	1	2	3000		1		37.6	36.5	36.5	38.3	38.2	28	28	28	22	22	110	115	111	100	105	120/82	118/83	117/85	110/84	108/85	99	99	99	98	98	70	71	69	65	67	5T	5T	5T	7T	7T	1	2	head	1	2	1
048S	3	2	2			2		37.1	36.8	36.7			21	22	25			98	98	98			105/78	110/78	110/80								75	76	78			14	15	15			1	2	1			1
049S	1	2	1		6	1		37.8					20					117					93/63					97					3					15					1	1	3	cancer	2	1
051S	2	2	1	2000	4	1	3	36	37	37			20	22	24			101	98	105			105/70	110/68	118/79			94	96	93				1500				10	15	15			1	2	3			2
052S	3	1	1	2000	3	2		37	37	36.5			26	19	18			110	115	98			100/75	110/80	120/75			98	99	96			30	30	30			2T	10	15	15	15	1	1		5	2	1
053S	2	2	2				2	34.5	36.9	36.7		37.1	19	24	18		17	160	152	122		101	UR/UR	183/110	180/113		136/95	95	97	99		99	500					12					1	1
054S	4	2	3	3000	2	1	5	37.5	38	37	36.5	36	30	28	27	20	18	100	120	118	98	96	100/65	120/80	100/60	90/58	118/67	95	94	94	93	96	1.2	1.5	2	2.5	1.3	8T	8T	7T	7T	7T	1	2	3		1	2
055S	1	2	1	4000	5	2	3	37					29					92					91/64					95					200					12					1	1				2
056S	1	2	1		10	1	1	35.5	36.2	36	36	36.1	24	16	26	32	25	62	102	105	102	102	55/33	95/65	94/60	115/85	110/82	97	96	92	92	93	500	1000	1200	1500	2000	4	10	15	15	15	1	2	pelvic	9	2	2
057S	2	2	1	2000	5		3	36.8	37.2	36			31	35	34			121	98	72			131/75	125/60	120/70			98	97	96			300	1000				15	15	15			1	1	1			2
058S		2	1		6			37.1	37.5	37.3			22	20	22			110	99	100			115/75	112/70	100/77			97	98	98			100	200	100			15	14	15			1	1	1	8	3
059S	4	2	1	25000	6	2		37		36.6			28		33		22	121		103		94	88/52		136/79		121/74	93		97		94											1	1	7	4,7	3
060S	1	1	1	2500	5	2	2	36.5	36.1	35.3	34.9	36.5	21	18	19	20	18	82	87	88	88	85	110/80	100/85	105/70	117/79	111/81	96	95	97	98	99	150	130	160	80	80	2T	9T	9T	9T	9T	1	2	7	1	2	1
061S	2	2	2	2000	2			37.5	36.8	36	37.5	36.5	22	19	18	20	21	103	99	100	98	99	120/75	110/80	115/65	111/76	105/78	98	96	99	98	98	30	30	30	50	40	5	9	10	10	10	1	2	7	1	2	2
062S							1	37.8					28					146					104/47					99															1	1	1	4,8	3	1
063S	2	2	2					37.5	39	37			22	24	20			110	100	99			112/81	108/78	110/79			97	98	99			100	200	100			8	9	9			1	1		1	2	2
064S	2	2	2			1		37.8	37.8	37.8			26	26	26			108	106	106			100/70	79/54	80/50			89	89	90			38	35	35			2	2	2	2		1	2	3	1	2	1
065S	2	2	1	6000	3	2	3	37.1	37	36.9			16	18	17			86	88	90			120/81	130/79	110/80			97	99	98			100	500	300			15	15	15			2	1
066S	2	2	2			2		36.4	37				46	24				89	86				120/60	100/63				98	95				500	1000				15	15				1	1				1
067S	3	2	2				1	37	36.1	37			18	20	22			106	112	120			125/79	125/90	100/95			95	98	94			1000	800	1200			10	15	15			2	2
068S	2	2	2	2000	2	1		36.5	37	36	37	37.1	16	18	19	19	20	100	98	95	108	106	110/70	120/65	105/75	110/75	115/75	95	96	95	96	97	30	30	30	80	50	14	15	15	15	15	1	2	3	1	2	1
069S	2	2	2		5	1	7	38.3	37.6				23					141					95/42					95										-3	5T				1	1	1	1,3	3	1
070S	2	2	1		4	2	10	37.5	37.3	37.3	36.9	37.1	29	25	25	22	22	110	100	98	88	88	110/80	100/79	105/79	115/78	115/79	99	99	98	99	99	81	80	79	80	83	10	10	15	15	15	1	2	1	9	2	1
071S	2	2	1		4	2		37	36.7	37.2	37.5	36.9	16	16	24	20	22	88	86	111	110	98	131/92	131/84	120/82	125/85	127/83	98	99	96	97	98	1000	800	1000			15	15	15			2
072S	4	1	1	10000	7	2	3	37	39.7	39.8			32	22	23			122	112	130			102/58	116/52	93/60	95/54		97	94	92	95		1000	200	100	100	3	2	2				1	1		2	2
073S	2	2	1	5000	3			35.7	36.5	36.7	36.8	36.5	22	24				82	102	100	100	110	100/70	130/85	130/78	120/80	129/90	98	99				1000	2000	2500	1000	3000	15	15	15	15	15	2	1		MI	2	1
074S	3	2	1	5000	2		3	38	39.4	38			18	16	18			141	136	138			108/75	99/76	113/78			97	94				1000	1000									1	1		3		2
075S	2	2	1		8		1	36.7	35.8	37			18	16	20			86	80	84			88/60	86/64	87/62			99	99	100			150	1000	1200			15	15				2	1				2
076S	2	2	2	0	0			36.7	37				20	22	20			89	84	86			110/80	110/82	114/80			91	97	90			25	20	30			15	13				1	1	1
077S	2	2	2					38.1	38	37.1			30	26	28			155	110	114			110/70	110/80	114/81			96	96	97			100	50	54			4T					1	1		1	2	2
078S		1	1	3000	5	2	1	36.1	35.9	37			21	22				86	87	100			110/70	105/75	110/70			96	97	96			100	80	30			2T	2T				1	2		1	2	2
079S	2	2	3		3	1	7	37.3	37.4	37.1			28	18	18			85	86	86			100/60	90/64	110/60			96	96	94								14	14	15			1	1	1	1,7	3	1
080S	3	1	1	4325	3	2	2	37					22					90					120/70					96										15					2	1
081S	1	1	1	2000		1		37	37.5	36.5	36.4	36.3	22	16	20	18	16	122	232	110	112	114	105/65	110/70	107/78	128/88	106/87	94	93	94	96	98	30	30	40	30	40	3	5	5			1	1	1			2
082S	1	2	1		7	2		39.1	39	40			24	26	40			160	152	156			142/87	140/88	141/90			98	96	92			1.2	10ml	15ml			15					1	1				1
083S	2	2	1		5			40	35				38	29				92	121				92/51	82/41				94	95				200	300				7	8				1	1	1
084S	3	2	1					37.6	37.1				16	20				66	109				136/97	138/93				99	98				200	300				15	15				2	1				2
085S	4	1	2					35.9	36.5				20	22				85	89				132/94	140/100				95	97				100	200				14	15				2	1		1	2
086S	3	2	2		0		14	37	36.7				26	28				105	108				125/95	129	95			97	92				25ml	28ml				15	15				1	1	1	3,4	3	2
087S	1	2	1		9	2	1	36.9					24					95					92/63					96					1.2ml/hr					15					2	1		5	2
088S	2	2	1		3			36	37.2				36	34				119	116				118/73	108/54				100	99				300	200				12	13				1	1	1	7	2
089S								40.3					20					123					107/60					96															1	1	1	4	2	1
090S	2	2	1		7	2	2	37.5					22					110					130/80					97					70ml					15					2	2	7		1	1
091S	2	2	1		5	2	30	37	36.5				21	22				69	68				115/75	111/68				98	97				75ml/hr	70ml/hr				15	15				2	2	1	5	2	1
092S	1	2	1		8	2	2	36.7					20					92					128/68					97										15					1	1		6	2
093S	2	2	2					35	37	39			24	25	23			130	115	128			118/57	100/44	92/57			98	96	97			400	400	500			5	4	4			1	1				2
094S	2	2	1		7	1	7	36	37	36			40	36	26			78	80	81			127/62	129/61	116/62			96	67	97			560	300	400			15	15				1	1	1			2
095S	1	2	1		6	1	14	37.5	36.5	36.7	36	36	26	21	20	22	22	87	82	81	80		110/75	90/70	90/70	100/71		99	93	92			83	81	80	80		10T	15	15			1	2	Tongue	1	2	1
097S	2	1	2	7000		1		37.5	37.5	37.5			17	17	20			137	137	120			130/100	135/118	135/55			98	98	89			63	65	60			9T	9T	9T			1	2	6	1, AKI	3	1
098S	1	1	1	2000	11	2	90	35.6	36.2	36.5	36	36	20	22	21	21	22	65	74	70	72	72	130/80	129/70	120/76	125/73	125/73	98	95	97	97	97	500	80	70	70	70	15	15				1	2		9	2	2
099S	1	2	1		2	1		37	37.5	39		38	48	22	20		24	144	136	131		136	105/58	97/62	130/75		98/63	88	96	99		98	200	200	96		71	9	2T				1	1				2
100S	2	2	2		4	2	7	37	37.4	36.5	37.8	37.8	18	18	20	20		90	98	112	124	124	128/80	110/86	120/88	120/80		96	96	99	99	99						2T	2T	2T	2T	2T	2	1				1
101S	1	2	1		5	2	5	37.2		38.5			22		18			120		106			130/90		119/88			97		98								14					1	1		1,4,6	4	1
102S	1	1	1	2000	11	1		37	38.5	36.8			22	24	19			110	120	89			110/75	115/75	139/88			98	95	96			83	83	83								1	2	3	1	2	1
103S	1	2	1		8	1	2						32					104					119/49					94										4					1	1	1
104S	4	2	2					37.2		36.4			36		24			106		101			103/66		107/64			96		97								15		15					1, bonemarrow			1
105S	1	2	4		2	1	14	37					38					120					121/81					94										15					1	1	1	5	2	1
151S	4	1				2	2	37	36.9				24	22				96	105					110/70	116/63			96	99				110					15/15					2	1	8 N/P	11, PSYCHAT	2
154S	3		2					36.5	37.2	37.4	36.6	36.8	20	13	18	23	16	92	138	126	82	77	122/86	139/78	116/70	142/98	152/105	97	96	97	99	100											2	1
159S	2	2	1			2		37.4	36.7	37			34	32				81	106				110/65	99/66				98	98									14/15	15/15				1	1		7	1	1
123S	4	2	1		2	2	4	36.4	37	36.8	37.2	37.6	20	22	24	26	24	92	98	104	116	108	119/68	128/74	122/72	108/83	111/80	96	96	97	99	99	65	58	68	62	60	15/15					1	1	7	11,NO	1
150S	2	2	2			1	3	35.8	36	36.9			28	27	26			110	120	116			101/69	128	108/81			96	98	96			100	120									2	1	3	7	2	1
142S	1	2	1		11	1	3	36.8	36.9				22	26				87	92				114/64	104/59				96	95				83	50	83	50		15/15					2	1	1	5	2	2
152S	4	1	1	5000	4			38	37	38.1	37.7	37.2	28	18	19	20	24	131	94	103	106	110	87/56	94/64	105/66	118/73	109/61	98	96	98	98	97	200					15.0/15					1	1		4	2	2
114S	2	2	2					35.5					130					114					110/75					95										15.0/15					2	1
107S	1	2	1		2								26	27				42	40				197/62	180/68				92	90				200	200				14/15	14/15				1	1	1	6	3	2
110S	4	1	1	>400	3			37.3					24					100					122/83					97										15/15					2
112S	1	1	1	2000	5	1		37					38					172					166/105					93					30					2T					1	2	3	1	3	1
015M	1	1	1	>5000	12	1	9	36.7	35.9	36.5	37.1		26	24	30	36		100	115	110	90		130/85	125/90	128/95	120/70		94	95	94	90		60	70	55	58		15/15	15/15				1	1	8	5,7	3	2	3rd generation antibiotics
037M	4	1	1		4	2		37.5	38.5	36.6	36.4		44	30	36	28		110	90	103	90		127/90	116/77	119/69			93	95	96	96							13/15	14/15	15/15			1	1	8,GENERAL BODY			1	2
050M			1					38.5	35.5	38			28	26	28			112	102	116			90/50	100/55	94/54			92	94	94.6			200	2000				15/15	15/15	15/15			1	1		1	2	2
052M	2	1	1	5000	3			36.1					36					120					60/40					80															1	1	8	5	3	1
053M	4	2	1					36.5	36.8	37			20	22	20			81	90	180			120/85	130/89	135/96			97	97	96			2000	2500	2300			15/15	15/15	15/15			2	1		1	2
055M	4	1	1	5000	6			36.1	36.5	36.2			26	20	20			90	86	80			140/86	140/86	136/80			96	94	95			40	40	40			15/15	15/15	15/15			1	1	8	7,8,9	4	1
057M	1	2	1					37.6	38.6	39.2			30	28	40			112	108	100			120/80	130/90	180/92			96	98	92								7.0/15	15.0/15	15.0/15			1	1	8	1,3		2
113S	3	2	2			1		39.5	39.6	39.9	37.4	37.9	28	21	24	22	24	154	131	123	120	104	119/88	127/76	112/70	110/65	110/66	96	98	97	97	98	75	108	115			7.0/15	2.0/15				1	1	1		1	1
118S	2	2	1		2	1	1	38.3	40.8				28	32				121	128				134/75	96/54				97	99				95.8	56				10	3				2	1	1	7	1	2	2
120S	1	2	1		5	1		40	38.7	36.8	37.3	37.1	24	22	21	21	28	144	120	70	94	90	104/56	114/65	109/72	113/70	110/66	97	99	95	99	99	90	110	100	170	140	7	2T	3T			1	1	1,7	4	2	1
126S	1	2	1		6	2	4	36.5	36.8	36.9	36.7	36.4	38	32	24	36	30	92	85	73	91	92	98/64	123/73	1975-11-01	92/66	100/77	90	92	96	92	93	80	95	100	100	100	15	15	15			1	1	3	5	2	2
130S	1	2	1		7	1		38	37.8				24	22				103	105				153/79	100/56				96	98				280										1	1	1	7	3	1	3
136S	3	1	2			1	2	36.7					22					92					116/68					96										15					2	1	3	11	1
149S	3	2			5																																						2
180S	4	2	2					37	37.1				28	26				72	72				105/65	110/70				98	99				100	200				15/15	15/15				2	1		4	1	2
181S	2	2	1		3	2	3	36.3	36.6				22	20				86	92				130/80	104/64				95	97				150					15/15					2	1				1
182S			1			1							26	20	19	18	19	112	108	105	92	90	146/90	142/102	153/110	150/85	144/83	96	94	96	98	93	41.6	78.1	70.8	104	466	8.0/15					1	1	1,4	6	2	1
185S		2	1		7	1	2						22	24	20			89	78	90			103/62	106/66	105/83			94	95	98			62.5										1	1	1			1
186S	2	2			8	1	9						26	24				79	81				114/76	117/79				96	93									14.0/15	14/15				2	1		4	2	2
184S	2	2	2			1		39.2	39.8	39.4			24	26	48			132	137	141			114/77	125/66	119/72			99	96	93								9.0/15	9.0/15	7.0/15			1	1				1
	1	2	1		3			36.6	36.7				22					101					120/78					96					70					15.0/15	15/15				2	1		5,9	2	2
119S	1	2	1		4			38.2	38.4				28	20				98	102				85/49	106/62				97	99									15/15	15.0/15				1	1	4	9	2	1
125S	1	2	1		5	1	5	36	35.9	36.2			17	16	19			106	112	100			167/97	152/91	141/89			99	98	100			300	340	380			15	15	15			1	2	8(Neck)	1	1	2
167S	1	2	1	6000	7	2	1	36.9	37	36.5	37.3	38	22	20	21	22	21	98	97	98	99	98	100/64	104/63	110/65	100/66	120/70	96	95	98	97	96	40	39	40	38	40	15	15	17	15	15	1	2	7		1	2
129S	1	2	1	3000	5	1		36.5	36.8	36.4	37	36.6	25	24	20	23	22	134	121	86	130	110	96/66	102/78	119/72	120/70	120/71	100	99	96	97	99	30	40	35	40	45	15	15	15	15	15	1	1	4	1,4	2	2
132S	2	2	4	5000	7	2	2	37.1	36	36.5	37		23	22	23			112	100	120			112/95	100/76	115/70			97	98	98			30	35	40			14	14	15			1	2		6	2	1
134S	1	2	1		2	2		37	36.9	36.8	37	36.7	22	18	18	20	19	133	122	102	104	98	89/62	100/65	110/75	120/80	110/72	93	95	98	97	99	40	35	40	35	65	15	14	14	14	15	1	1(obs Gyn)	3		1	1
135S	1	2	1	5000	4	2		36.5	37	36.8			20	18	19			121	115	103			162/110	120/75	118/80			99	98	97			35	30	40			15	15	15			1	2	8(CA)	9	1	1
137S	4	1	1	2000	2	1		37	37	37			10	18	22			96	98	99			123/73	120/70	122/80			95	96	98			40	40	40			15	15	15			1	2	6	1	2	1
139S	3	1	2	3000		1		36.8					19					110					140/90					90					30					14					1	2	8(Chest)	1	2	1
140S	1	2	1		5	1		36.8					19					100					115/75					99					30					14					1	1	8(Neck)	1	2	1
141S	4	1	1	6000	2	1		39.5	38.3	38			29	26	18			136	107	110			117/90	118/89	113/98			95	96	98			10	20	30			14	15	15			1	1	1		1	2
144S	2	1	1	5000	6	2		36.7	37	36.8	37	36.5	18	20	18	16	14	88	86	84	84	80	98/80	100/85	110/70	110/70	110/70	98	96	98	97	98	30	40	30	30	30	15	15	15	15	15	1	2	1,6		1	2
143S	4	1	1	15000	3	1	1	35.9	36	36	36.1	36.2	29	22	20	18	18	110	116	112	118	120	129/78	130/80	150/84	152/84	148/80	97	98	96	97	98	50	40	20	20	20	10T	10T	10T	10T	10T	1	1	3		1	2
153S	2	1	1	3000	3			36.5	37	36			19	18	19			96	100	96			120/70	110/75	110/75			95	95	98			30	40	40			15	15	15			2	1	7	5	2	2
155S	2	1	2	5000		1		37	36				28	24				130	122				95/65	110/75				35	30				30	40				5	5				1	2	8(Head)	1	2	2
156S	2	1	1	3000	3	1		38	37.5				24	28				110	95				110/75	115/55				95	75				30	40				5	5				1	2	1	1	2	2
161S	2	2	2		3	2	0	36.7	36.1	36.4			24	22	20			99	98	100			120/88	132/86	130/84			98	99	98			40	42	40			25	25	25			1				1
162S	3	2	2	2000	1	2	0	36.7	36.2				22	20				116	115				120/70	130/85				96	97				40	40				15	15				2	2				2
163S	1	2	1	>5000	6	2		36.2	36	37			20	18	22			98	96	102			120/80	110/70	116/73			96	95	97			40	40	40			10	10	10			1	2	3	7	2
164S	1	2	1	>5000	4	2	0	36.7	36.9	37	36.1		20	20	18	22		881	801	841	861		150/90	140/88	146/89	140/85		97	98	99	98		30	40	40	40		8	9	9	10		1	2			1	2
165S	3	1	1	8000	4	2		36.9	37	36			42					140					60/45					85					204					10	10				1	1	3	9	2	1
157S	2	2	1		5			36.9	37.1				28	30				122	106				117/74	108/66				96	97				40	40				15	15				1	1		7	2	1
166S	2	2	1	11000	5	2	30	37					26					112					140/98					99					30					10					1	2	1,7	7	2	1
58M	2	2	1	6000	4	1	14	38.1	38.5	39	37.8	37.6	24	25	25	22	22	123	127	121	129	130	140/85	150/87	132/80	120/70	117/73	92	95	94	96	99	40	40	38	40	45	10	10	10	10	10	1	1	6	4,5	3	1
106S	1	2	1		5	2		37	37.2	37.5			25	20	22			111	118	120			100/80	105/75	120/70			94	96	97			100	200	300			12	13	14			1	1	1	3	2	1
138S	1	2	4	7000	7	2	8	36.8	36.5	37			20	22	24			110	113	114			120/80	117/75	114/70			96	97	96			300	400	400			13	14				2	1	6		1	2
160S	1	2	1		4	1		37	37.2	37.6			18	20	22			106	1128	120			110/65	99/67	100/60			97	98				100	200				15	10				1	1	1	1	2	2
169S	2	2	1		6	1		35.6	36.5	36.6			26	24	22			90	106	96			127/84	109/65	102/80			98	97	98			60					15	15	14			1	1	3		1	1
174S	1	2	1		6	2	7	36.4	36.6				20	20				97	88				97/66	103/65				97	98				450					15	15				2	1	7	4	2	1
172S	1	2	1		3	2		36.7	37				36	34				110	114				106/54	118/73				98	99				200	500				14	15				1	1	5	1	2	2
170S	2	2	1		7	1	12	36.2	36.4	36.3			30	26	28			86	90	84			124/70	120/88	126/74			98	99	99			70					14					2	1	1		1	1
183S	1	2	1		6	2		36.8	37.1				24	23				145	130				126/89	132/92				97	96				50	60				15	15				1	2	2		1	2
158S	4	1	1	5000	4	2	7	36.8					22					113					120/75					97					400					10					1	1	1		1	2
56M	1	22	1	4000	7	1		37.4	38.1	37.7	37.3	37.5	27	26	27	24	22	120	123	128	117	121	140/85	120/80	123/85	117/75	121/70	96	97	97	98	99	400	350	400	400	400	10	12	13	14	15	1	2	1,4	1,2	3	1
54M	2	2	2		Child	1		37.7	37.4	38.5	39	37.1	20	19	20	21	22	131	130	126	117	124	120/70	117/74	110/70	130/65	109/71	95	96	97	99	98	400	300	400	500	400	14	14	13	15	15	1	2	1,3,9(Head)		1	1
193S	2	2	1		5	1	12						18	22	20	24	22	106	89	96	88	94	136/92	128/90	140/84	132/84	136/82	99	98	99	98	96	210	180	230			15	15	15	15	15	2	1	5	6	2	1
59M	3	2	1	4000	4	2		36.7	37	37.2	36.9	37.1	24	23	24	22	22	99	97	98	102	107	130/85	120/73	113/70	121/68	107/67	85	97	99	98	98	400	400	400	400	400	15	15	15	15	1`5	1	1	5,9(Chest)		1	1
60M	3	1	2		2			36.9					24					104					119/76					97					400					14					2	1	3		1	2
61M		2	1		4	2		36.4					22					104					125/83					94					40					12					2	1	3	6
111s	1		1	3000	5	1		37	36.5	37			22	28	32			118	120	135			110/65	115/76	110/65			99	98	99			80	80	30			95					1	2	3	1	2	2
115s		1	1	3000	8	1		36.5	37	36			24	20	19			130	98	100			116/75	110/70	100/65			98	97	99			30	80	80								1	2	3	1	2	2
116s	1	2	1	3000	3	2	30	36.6	36.9	37			24	26	20			122	126	101			119/93	126/96	112/98			96	99	96			1100	2200	2000			15	15	15			1	2	8		1	1
117s	3	2	1	7000	5	1	1	38.9					32					135					95/60					86										4					1	2	3	4	2	1
121s	2	2	1	5000	2	1	1	37.6	37.4	37			14	14	18			134	106	103			126/78	136/99	130/96			99	94	99			30	32	30			21	10	15			1	Obygyin	1,8	4	2	2
124s	1	2	1	2000	7			36.6	37	36.5			22	24	18			122	130	100			122/74	164/103	140/89			98	99	99			30	30	30			2					1	2	3	1	2	1
127s	1		1		6			37.2					24					138					118/72					97										15					1	1
128s	2	2	1		6	2	7	38.18	37	37.5			43					143					93/48					87															1	2	1			1
131s	3	2	2			2	2	36.7	36.7	37.7	37.2	37.7	19	21	24	22	24	132	127	118	122	126	106/71	119/67	133/91	128/84	132/80	93	95	96	97	99	58.3	100	104.1								1			None	1	1
133s	4	1	2	11000	5	2	1	37.6	37.8	38.2	37.9	38	32	28	30	16	14	133	123	130	128	132	121/77	107/62	127/73	111/66	130/69	95	97	93	92	98	2000	2600	3300	4600	4300						1	2	1,6	None	1	1
145s	3		1		4		4	36.6	38.5				36	28				126	96				164/113	149/96				98	99									15					1	1				1
168s	2		1		8			39.8					19					139					83/41					99										15					1	2	3			1
171s	3	2	1	10000	3	1	8	37.3	37	37.1	36	36	20	22	22	23	22	113	115	118	98	76	117/71	119/70	120/75	122/64	120/62	97	99	98	97	94	2000	1500	1600	1200	1000	15	15	15	15	15	1	2	1		1	2
175s		3	1	10000	3	2	2Hr	37	37.1	36.8	36	38.6	16	20	26	14	16	116	101	106	86	72	130/77	133/74	126/82	139/73	114/76	96	97	98	73	96	2500	2000	1600	1400	1600	6	8	9	10	15	1	burn	6	11	1	2
179s	2	2	1		3			38.4					48					115					109/63					88					200					14					1	1
189s	2	1	2		6	2	1	36.5	37	35	36.5	38.5	28	16	20	24	18	102	104	106	102	101	77/49	101/59	118/85	120/76	118/75	86	96	98	98	96	200	600	2000	2000	2400	7	7	10	11	11	1	2	8,head	11	1
194s	3	2	2		6	2	3	36.3	36.5	36.2	36.4	36.3	22	19	22	22	24	96	78	90	60	64	110/70	100/60	390/60	89/58	83/44	97	96	98	98	97	50	60	55	1600	1500	10	13	14			1	2	8,Head	1	3	1
196s	2	2	2			2	6hr	36.5	36.1	37.6	36.9	36.7	28	24	26	16	18	134	79	112	122	120	130/79	126/64	124/79	122//80	129/88	94	92	99	94	93	2000	2500	2000	2500	2600	2	2	3	5	6	1	2	6	11	1	1
199s	1	2	1	650	6	2		37	37	38	37	36.5	20	16	19	14	12	108	108	94	94	96	110/67	124/80	130/90	120/82	114/76	96	99	98	96	98	4000	2000	3000	2000	2500	2	3	3	4	4	1	2	8,head		1	1
	3	1	1	3500	2	1		37.5	37.6	37	36.4	36	20	24	22	20	24	84	80	86	102	104	96/67	110/70	94/60	123/84	120/70	90	92	92	80	76	1500	1300	1800	1600	2000	2	2	3	4	13	1	2				1
147s	2		1			3		36.8	36.6	37.6	37.8	37	22	29	24	24	28	118	100	100	120	105	124/92	150/90	130/80	130/100	140/98	99	96	96	96	96						15	15	15	15	15	2	1				2
173s	2	2	2		4	1	2	37.2	36.9	37			28	20	22			109	120	119			116/70	120/68	118/70			96	98	99			200	180									1	2				2
176s	2	2	1		5			135.3	36.01				26	24				102	108				123/93	126/100				99	99									15	15				2	1		5,6	3
177s	1	2	1		5			37					20					106					117/67					98					200										2	1			1
178s	1	2	1		3	2		37	37.2	37.3			22	24	26			97	95	98			146/84	125/86	120/88			95	97	98			100	200	100			10	12				2	1		4	3	2
190s		2	2					37.5	38.5				14	15				97	117				118/73	124/97				98	95				200	100									1	1			1	2
192s		2	2					37	37.5				11	14				141	136				133/65	99/70				98	99				100	200				15	15				1	2	6		1	2
195s	2	2	1		3			37	36.8	37.2	36.4	36.6	20	24	24	22	24	107	88	90	80	92	130/90	126/80	102/88	118/74	122/77	98	98	99	99	99						15	15	15			2	2	8,skin
198s	1		1		5								22					116					122/82					97															2	1
201s	2	2	2					37.5	37.4				20	28				154	137				131/79	124/69				98	97				100	200				7	10				2	1			1	2
203s	4	1	1		4	1	1	36.7	36.8				22	24				140	156				116/66	100/70				92	94														1	1	1		1	1
045M	1	1	1	3500	1			38.1	39.3	38.5	37.5	36.5	32	30	30	28	28	97	96	98	98	86	110/70	110/70	90/40	90/50	100/60	98	99	98	98	100	40	60	60	20	20	15	15	15	15		1	1	5	4	3	2
047M	4	1	1	5000	5	2	5	36.3	36.1	36.5	36.8	37	28	28	26	27	21	108	104	80	90	90	90/60	100/60	92/58	85/70	101/60	95	93	97	92	94	400	400	400	400	400	15	15	15	15		1	1	1	1	1	22
048M		2	1					36.4	37	31	36	36.5	24	25	24	21	22	120	130	99	90	85	96/60	100/90	110/65	105/68	95/80	96	98	96	92	96						15	15	15	15		1	1		11	1
049M		2	1			2	1	36.5	36	36.5	37	36	22	24	22	20	20	84	90	90	82	85	80/50	99/60	105/71	100/70	105/72	86	88	90	92	94						15	15	15	15		1	1		1	1	1
051M	1	1	1	3500	2			36.5	36.7	36.7	37.5	37.2	20	20	20	20	20	80	86	86	85	86	110/70	110/75	100/75	115/70	110/75	92	93	94	94	94	200	200	200		200	15	15	15	15	15	1	1	1	1,4	3	1
M41	4	1	1	12000	3	1		37.1	38	38.6			26	25	27			108	110	112			80/50	90/57	110/70			97	98	97			400	400	400			15	15	15	15		1	1	1	5	2	2
M39	4	1	2		0	1		37	37.1	37.1	36	36.8	20	20	22	20	22	108	108	110	100	108	90/65	90/60	80/60	96/65	95/59	98	98	98	98	96	50	100	110	100	150	15	15	15	10	10	1	1	1	1	2	1
M43	2	2	2	2500	3	2		36.2	36.1	36.2	36.4	37	22	28	26	26	26	150	130	120	100	110	130/80	120/70	110/70	120/80	110/73	95	98	96	96	97	400	500	400	400	400	15	15	15	15	14	1	1	1,5	3	2	2
M42	1	2	1		6	2	3	36.8	36.3	36.4	37.1	36.9	28	24	26	27	23	108	100	114	107	108	104/73	98/67	110/70	120/80	110/78	92	97	99	98	96	300	400	400			15	15	15	15	15	1	1	4	5,7	3	1
M44	1	2	1	2500	6			36.2	36.2	36.5			28	28	27			86	20	120			160/80	160/80	80/50			96	98	92			50	50	50			15	15	15			2	1	7	6,7	3	1
M40	1	2	1		6	2		36.2	36.1				38	30				120	110				90/50	90/55				86	92				100	80				15					1	1	1		1	2
M38	1	2	1		6	2	2	36.9	36.4	36.6	36.4	36.1	26	24	24	26	24	70	68	68	78	74	180/100	154/90	130/84	120/78	120/78	94	94	93	96	95						15	15	15	15	15	2	2	3	6	2	2
M46	3	2	1	10000	4	2		36.7	36.8	36.4	36.7	37	28	28	27	26	28	94	80	97	94	104	90/60	95/60	100/65	120/70	97/60	94	95	96	97	94						15	15	15	15	15	1	1		5,6	3	2
M62	3	2	1	16000	6	2		37.5	36.9	36.5	35.5		24	24	22	22		102	80	86	98		100/80	120/70	118/65	112/73		96	92	94	98							15	15	15	15		1	1		1	2	1
M63	4	1	1	7000	4	2	3	36.7	36.1	36.4	36.3		28	24	26	24		87	85	79	82		137/73	122/84	130/70	130/75		94	97	92	97		50	54	48	54		15	15	15	15		1	1	8(Heart)	1,6,7	4	2
M64	3	2	1			2	7	36.5	36.4	36.7			30	22	24			48	52	54			132/79	129/86	134/83			95	97	96			54	66	64			15	15	15			1	1	7		1	2
S122	1	2	1	5000	7	2		36.1	36.5	36.2			22	22	22			125	110	90			100/70	110/68	90/69			89	90	90			100	110	150			15	15	15			1	1	1	1	2	1
S212	2	2	1			1		36.6	37.1	37.4			22	28	18			111	108	90			122/70	120/68	110/66			99	99	98			200	200	200			9	15	13			1	1	3		1	1
S203	2	2	1	10000	7	1	13	38					26					119					140/91					87					300					10					1	2	6	1	2	2
S209	1	2	1	10000	5	2		36.5	36.5	36.9			24	22	22			102	126	134			140/89	146/92	128/70			96	97	96			2860	2000	2000			13	13	15			2	2	7, 8(Brain)		1	2
S204	1	2	2		5	2	12	36	37	36			40	36	48			149	156	148			88/35	76/30	74/34			76	87	88			1000	500	550			4	3	4			1	1	1.5,7	1,9	3	1
S207	2	2	2	600	9	1	13	38	38.5	38	37	37.6	26	38	32	26	36	148	98	128	130	88	120/71	123/74	142/90	120/80	110/92	96	95	94	96	98	1000	2000	1500	1400	1200	12	13	14	15	15	1	1,2	1,3	1,	2	1
S200	2	1	1	3000	3	2	10	37					21					77					100/60					92					1000					15					1	2	6	7	2	1
S213	2	2	2		9	2	120	35.3	36.2	36.4			26	22	12			118	120	94			125/70	110/69	120/74			96	98	94			2000	4000	4000			7	13	15			1	2	7		1	2
S25	1	1	1	4500	4	2		36.2	37	36.5	36.8	36.5	24	26	21	22	22	120	118	82	78	86	95/40	108/71	120/85	122/81	120/72	98	96	98	98	98	2000	2000	1600	1800	1400	12	13	14	15	15	1	2	8(Brain)	11(Brain tumor)	2	1
S225	4	1	1	5500	6	2	7	36.2	36.5	37			28	26	24			115	96	98			166/89	130/89	128/79			93	94	93			2000	1800	1850			6	7	15			1	2	1,3	1,5,6,7	4	1
S27	2	1	1	18000	2	2	2	36.5	36.9	38	38.4	37.5	8	9	12	12	27	121	122	120	106	104	127/89	126/83	120/78	120/87	122/82	96	96	97	97	96	1000	2000	2000	1800	25000	2	3	4	6	8	1	2	7(Head)		1	1
S223	3	2	2	15000	7	1	1	38	38.4	38.9	37.9	38.2	26	30	32	28	24	106	128	144	96	104	92/55	88/59	138/78	115/78	108/76	96	98	96	98	98	2000	2500	3200	2500	4000	3	7	7	7	7	1	1	1,7	1,5,7	4	1
S219	1	2	1	10000	6	2	7	36.5	36	36	36.5	37.7	22	24	24	26	28	88	82	110	117	109	130/90	136/92	130/88	136/92	114/90	96	97	96	94	93	1800	1400	1200	1400	1400	12	15	15	15	6	1	2	7,9(Head)	9(Brain tumor)	2	1
S221	2	2	1	10000	2	2	2hr	37	36.5	36.5	37	37	24	26	22	24	26	84	86	126	113	86	101/81	130/86	134/93	100/63	126/94	95	94	93	93	94	2000	1500	1200	1500	2400	13	12	15	15	15	1	1	1,7	4,5,6	4	1
197S	3	2	1		11	1							14					103	122	108	140	136	169/87	140/96	130/95	126/90	132/90	98	99	98	99	99						10//15					1	1	1	1	2	1
205S	2	2	1					39.9	38.1				29	34	30	26	26	124	132	108	96	102	137//69	119/64	106/56	99/84	104/80	92	98	99	99	99	80	100	110	105	120	15/15					1	1	1	1,4	3	1
206S	2	2	1		3	1	18hr	39.8	38	38.3			19	18	24			122	110	116			115/73	125/68	120/70			98	99	97			140	100	86								1	1	6	11	1	1
208S	2	2	2			1		38.2	39.4	37.2	36.7	37	40	42	45	14	22	140	130	135	127	131	114/71	116/80	120/85	119/85	126/78	96	98	99	99	99	330	200	220	300	240	9//15					1	1,2	6	7	2	1
210S	4	1	2	8017	3			37.1	37				28	26				100	105				90/60	92/65				90	95				100	200				4//15					1	1	5		1	1
211S	1	2	1		4			36.1	37.1				24					80					101/60	90/59				98	99				100	200				13//15	14//15				2	1	8	5	2	2
215S		2	1			1	1	36.7	36.4	36.6			30	20	18			120	108	96			104/59	100/65	104/60			98	98	97			260	162.5	120			14//15	15//15	15//15			1	1	4	7	2	1.2
220S	3	1	2			1		38.2	37.5	36.6	36.7	37.5	20	21	14	18	28	104	100	104	118	122	125/76	120/65	128/78	128/80	132/79	98	97	95	99	99	150	113	120			7//15	3//15				1	1	1	11	1	1
222S	2		1		4			36.7	36.6	37.3			20	22	24			108	100	104			89/50	92/56	142/98			94	98	99								11//15	12//15	12//15			2	1	8	7,11	3	1
214S	1	2	1	5000	4	2	3	38.2	37	37.1	37.3	36.5	24	36	20	24	24	102	114	108	108	104	120/82	126/85	124/70	136/86	120/82	97	9	93	96	98	2500	2500	2000	2400	1800	15//15	15//15	15//15	15//15	15//15	1	2	8	11	1	1
216S	2	2	`	10000	5	2	60	36.9	36.4	36	36.5	37	24	22	24	24	26	90	88	96	96	94	113/81	116/82	105/72	104/74	110/72	97	96	94	96	94	1150	1210	1300	1000	1050	4//15	15//15	15//15	15//15	15//15	2	2	3,8	9,11	1	1	cef,metrendazol
217S	3	2	1	9000	7			35.5	36.5	36.4	36.5	35.5	18	20	24	15	16	76	92	94	94	86	130/97	118/72	116/73	120/76	118/82	97	93	93	97	98	2000	1200	1600	1800	2200	10//15	10//15	10//15	10//15	10//15	1	1	1	11	1		CEFTRAZONE
218S	3	2	1	8000	6	2	60	35.6	36.5	35	36.5	36	24	24	30	22	24	86	84	106	76	78	125/77	105/75	105/70	120/76	127/78	93	94	95	96	94	1500	1200	1300	2000	1800	3//15	8//15	15//15	15//15	15//16	1	2	3	9.11	1
224S	1	2	1	8000	8		8	37.2	37	37.4	36	37	24	20	22	24	20	116	74	116	102	88	109/69	106/72	110/70	108/70	106/78	94	96	94	96	96	2100	1400	1200	1200	1200	4//15	15//15	15//15	15/15	15/15	1	2	1,8	9,11	1	1
230S	3	2	1	5000	3	1	3	38	38	37.2	38.5	38.4	32	30	28	34	30	108	106	87	100	98	130/76	128/78	123/71	119/79	120/86	96	98	98	96	97	2650	3400	500	600	500	1900-01-03	1900-01-10	15	15	15	1	2	1,3	1,4	3	1
70M	2	2	2	7000	4	1	4	40					38					150					90/40					95					30					2T	2T				1	2	3		1	2
69M	2	1	1	1500	2	2	2	37	37.2	38.4	37.8	38.2	30	24	26	18	30	107	106	104	88	86	145/88	138/86	130/89	120/84	126/84	90	94	95	96	96	1500	1200	1400	500	600	3	4	15	15	15	1	2	1,3	1	2	2
68M	2	2	2	3000	4	2	2	37.2	36.4	36.9	36.4	35.6	32	28	18	16	18	130	106	100	104	106	140/90	120/76	124/80	114/90	103/61	96	93	94	94	93	500	450	500	450	524	4	4	4	4	15	1	1	1,7,8(GBS)	1,4,11(GBS)	4	1
228S	3	2	2		5	1	7	38.3					40					128					140/98					94					100					7					1	1	7	4	2	1
229S	2	2	2		3	1	5	38.5	38.2	38.5			48	42	38			156	150	149			120/80	124/82	105/65			88	90	98			500	300	450			2	10	12			1	1,2	1,3,6	1	2	1
67M	4	1	1	6000	4	2	6	36.2	36.8				22	20				80	87				110/70	120/80				95	96										15	15			2	1	3	5	2	NO antibiotic
65M	1	2	3		2	1	2	37.5	37.2	37.1	36.8	37	30	28	30	32	31	95	86	87	92	94	110/95	115/85	100/90	120/80	117/74	96	97	95	97	96	3800	3600	3200	3600	3400	15	15	15	15	15	1	1	5	4	2	1
66M	1	2	1		3	1	3	37.8	38.1	37.5	37.1	38.4	30	28	29	28	30	89	85	90	88	89	100/70	110/80	95/75	105/75	120/80	89	92	94	98	94	3200	300	350	400	380	12	12	14	15	15	1	1	1,5	4	2	1
[truncated: 9 more columns]
